# Supplementary material for: Synergetic effect of sodium polystyrene sulfonate and guanidine hydrochloride on the surface properties of lysozyme solutions
Source: Royal Society of Chemistry journal article supplement (doi:10.1039/c4ra14330b), 2014-12-19
Supplement: c4ra14330b1.pdf [file c4ra14330b1.pdf]

## Supporting Information

### Synergetic Effect of Sodium Polystyrene Sulfonate and Guanidine Hydrochloride on the Surface Properties of Lysozyme Solutions

Olga Yu. Milyaeva<sup>a</sup>, Richard A. Campbell<sup>c</sup>, Shi-Yow Lin<sup>b</sup>, Giuseppe Loglio<sup>e</sup>, Reinhard Miller<sup>f</sup>,  
Mihael M. Tihonov<sup>a</sup>, Imre Varga<sup>d</sup>, Anna V. Volkova<sup>a</sup>, Boris A. Noskov<sup>a\*</sup>

<sup>a</sup>Department of Colloid Chemistry, St. Petersburg State University, Universitetsky pr. 26, 198504 St. Petersburg, Russia

<sup>b</sup>National Taiwan University of Science and Technology, Chemical Engineering Department, 43 Keelung Road, Section 4, Taipei 106, Taiwan

<sup>c</sup>Institut Laue-Langevin, 71 avenue des Martyrs, CS 20156, 38042 Grenoble Cedex 9, France

<sup>d</sup>Institute of Chemistry, Eötvös Lorand University, Budapest 112, P.O. Box 32, H-1518 Hungary

<sup>e</sup>Dipartimento di Chimica Organica, Università degli Studi di Firenze, Via della Lastruccia 13, 50019 Sesto Fiorentino, Firenze, Italy

<sup>f</sup>MPI für Kolloid- und Grenzflächenforschung, Wissenschaftspark Golm, D-14424 Golm, Germany

Corresponding Author

\*E-mail: borisanno@rambler.ru

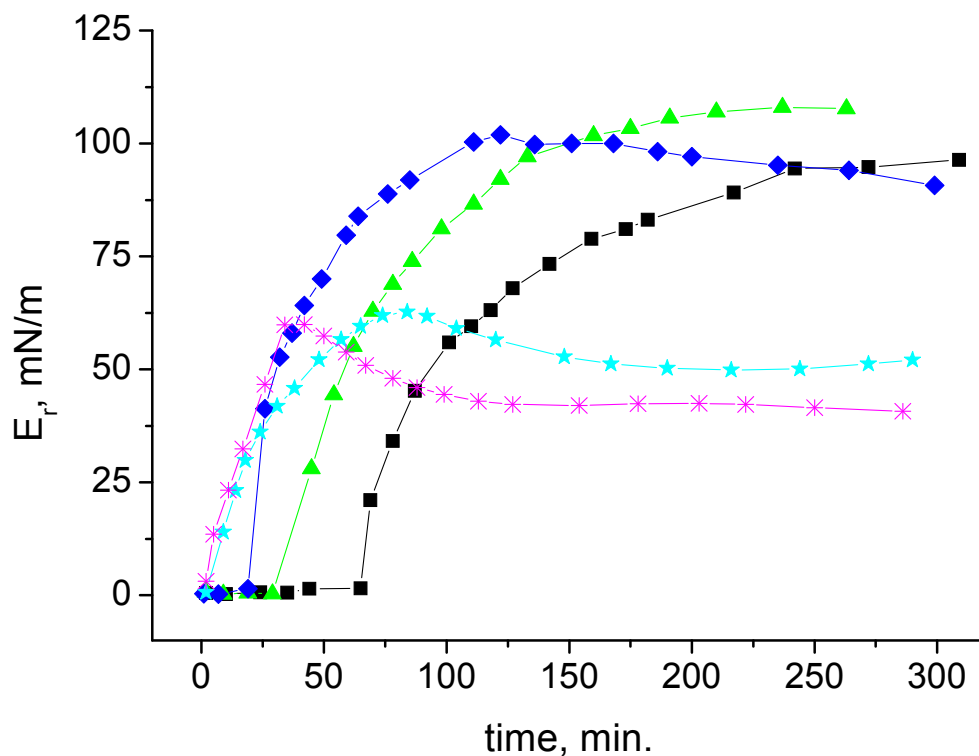

Fig. 1. Kinetic dependences of the dynamic surface elasticity of mixed lysozyme/urea solutions at various urea concentrations: 0 M (black squares), 1 M (green triangles), 2 M (dark blue diamonds), 5 M (blue stars) and 8 M (pink snowflakes).

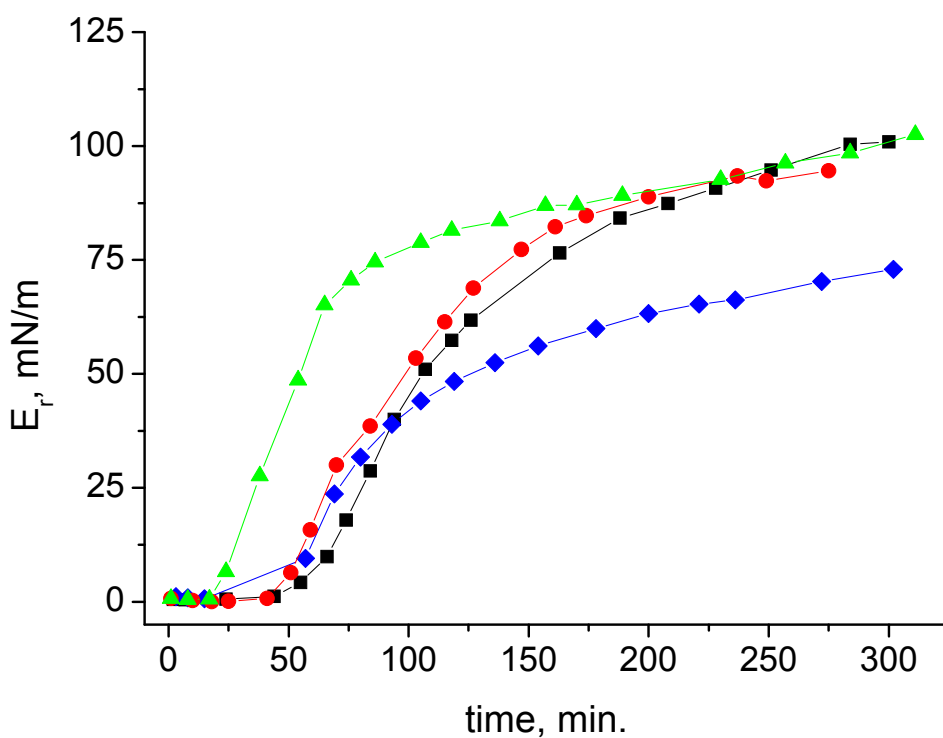

Fig. 2. Kinetic dependences of the dynamic surface elasticity of mixed lysozyme/PSS solutions at high ionic strength ( $C_{\text{NaCl}}=0.1$  M) and various polyelectrolyte concentrations: 0 g/L (black squares),  $2 \cdot 10^{-5}$  g/l (red circles),  $2 \cdot 10^{-4}$  g/l (green triangles),  $2 \cdot 10^{-3}$  g/l (dark blue diamonds).

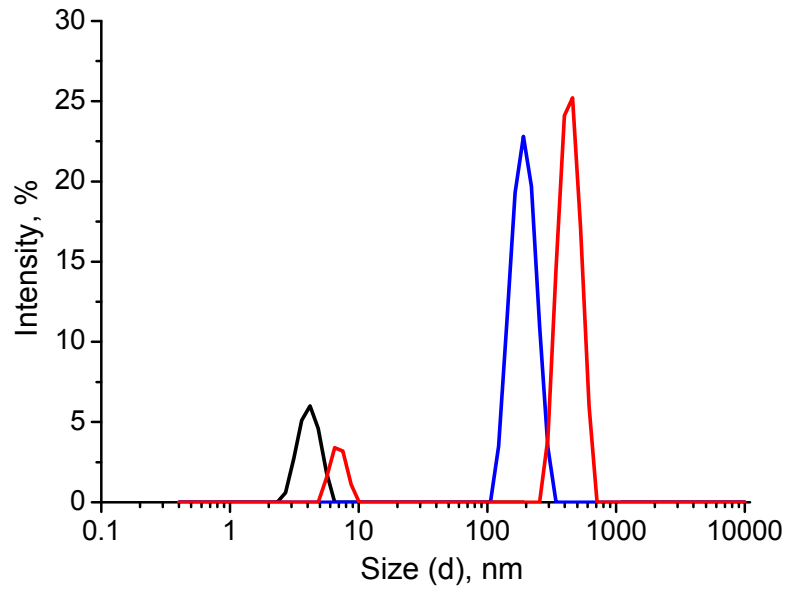

Fig. 3. The dependency of the scattering intensity on the particle size for mixed lysozyme/PSS-GuHCl solutions at various concentrations of polyelectrolyte: 0 g/L (black line),  $2 \times 10^{-5}$  g/l (dark blue line), and  $1 \times 10^{-1}$  g/l (red line).
